# Supplementary material
Source: Springer Nature journal article supplement (https://www.springermedizin.de/resource/supplementary/12889_2013_6400_MOESM7_ESM.pdf/9497628)

- Qualitative data: results presented in this study
- Quantitative data: results *not* presented in this study

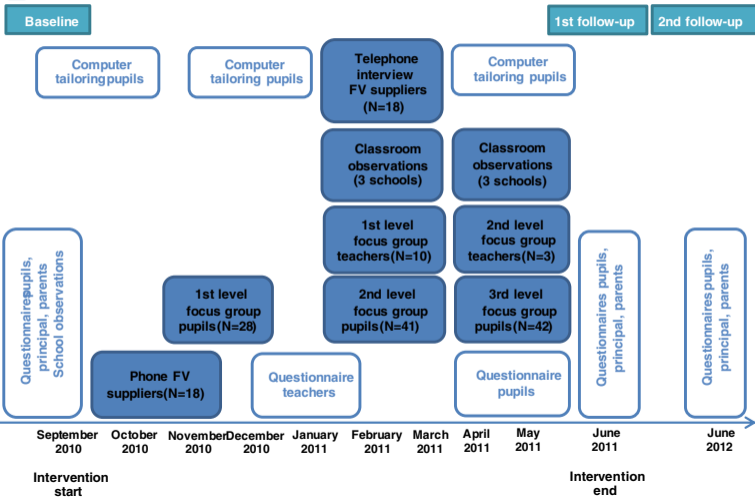

Supplement: MOESM7 [file 9497628]
